# Supplementary material for: Using “Diraya” System as a Complementary Tool in Nursing Process Education: A Controlled Clinical Study
Source: MDPI journal article supplement (doi:10.3390/jcm11102771), 2022-05-14
Supplement: s1 [file s1]

## Supplementary Materials

### MULTIPLE-CHOICE TEST

1. **Assessment stage:**
  - a. We measure the vital signs of patients.
  - b. We identify the current health status of patients, their needs/problems, and possible risks they are exposed to.
  - c. We gather objective data to detect the needs/problems of patients.
  - d. Not necessary because physicians have already carried this out.
2. **Focused assessment:**
  - a. Performed at the first contact with patients.
  - b. Consists in carrying out the physical examination of a body area.
  - c. Consists in focusing attention on vital signs of patients.
  - d. Centers on the problems/needs detected.
3. **When is the outcome indicator score given after an intervention?**
  - a. In Planning.
  - b. In Assessment.
  - c. In Implementation.
  - d. None are correct.
4. **In the physical examination:**
  - a. Palpation is the careful observation of an individual to determine physical characteristics, including size, shape, position, anatomical localization, color, movement, and symmetry
  - b. Inspection is the use of touch to determine the characteristics of some body structures located beneath the skin, allowing size, shape, texture, mobility, and consistency to be determined
  - c. A and B are correct
  - d. None are correct
5. **Critical thinking (MARK THE INCORRECT RESPONSE):**
  - a. It is controlled and deliberate thinking focused on achieving an objective.
  - b. It requires data analysis and processing.
  - c. It is innate and does not require practice.
  - d. It is essential for application of the nursing process.
6. **In the planning stage the first step is:**
  - a. To establish patient outcomes.
  - b. To determine priorities.
  - c. To formulate nursing diagnoses.
  - d. To determine the baseline score.
7. **According to NOC taxonomy, a dependent nursing outcome is:**
  - a. Status, behavior, or perception of an individual, family, or community measured over a continuum, using a measurement scale.
  - b. Specific outcomes that serve to determine the situation of patients.
  - c. The instrument to quantify the current status of patients and their progression over time.
  - d. A and C are true.
8. **Nursing interventions and activities are performed at the stage of:**
  - a. Planning
  - b. Assessment
  - c. Implementation
  - d. Evaluation
9. **From the following, which is a subjective datum?**
  - a. The patient drinks three glasses of water/day.

- b. The caregiver of the patient says that he/she defecates twice a day.
- c. The patient says he/she has difficulty breathing.
- d. The patient takes a siesta of 1 h/day.

**10. The objective of the nursing care process is:**

- a. Treatment of the disease.
- b. Response of individuals, family, or community to health problems.
- c. Correct functioning of organs and systems.
- d. Application of techniques to patients.

**11. In order to perform interventions, nursing professionals:**

- a. Carry out an assessment, monitor orders and equipment, wash hands, use gloves if required, identify patients.
- b. Always explain what they are going to do. Provide safety and privacy.
- c. Wash hands, use gloves if required, identify patients.
- d. A and B are true.

**12. The care continuity report:**

- a. Is given at admission.
- b. Provides information on the medication patients must take.
- c. Serves to inform patients/relatives on the care that must continue at home.
- d. All are true.

**13. The source of data for nursing assessment are:**

- a. Medical records are the most important because they gather a large amount of information.
- b. Individuals, their environment (relatives, caregivers), and professional records.
- c. Mainly individuals, who can always give the most information.
- d. Individuals and their family environment.

**14. Nursing interventions:**

- a. Can be independent, dependent, direct, or indirect.
- b. Can be independent, dependent, direct, indirect, focused, and general.
- c. Can be independent or dependent.
- d. Can be technical, focused, direct, or independent.

**15. Problems of collaboration:**

- a. Nursing professionals do nothing because it is not their responsibility.
- b. Nursing professionals monitor complications derived from a medical diagnosis or treatment.
- c. Nursing professionals administer prescribed treatments.
- d. B and C are correct.

**16. After performing an intervention:**

- a. There is no need to do anything because it is already described in the planning.
- b. We report it at the change of the shift.
- c. We record it, including the timeline and responses of patients.
- d. We record it before it is performed to avoid oversights.

**17. Real nursing diagnoses:**

- a. Describe human responses to health problems/life processes that may develop in a person, family, or community.
- b. Describe human responses to health problems in a person, family, or community.
- c. Describe human responses to increase the wellbeing and health potential of a person, family, or community.
- d. Describe human responses to health problems/life processes in a person, family, or community.

**18. In the NANDA-I taxonomy, a nursing diagnosis of risk consists of:**

- a. Name or label, definition, defining characteristics, and risk factors.
- b. Name or label, code, definition, risk factors, and defining characteristics.

- c. Name or label, code, definition, and risk factors.
- d. Name or label, code, definition, defining characteristics, and related factors.

**19. With respect to standardized care plans (MARK THE INCORRECT RESPONSE):**

- a. They are designed for a group of patients with common needs.
- b. They include the nursing diagnoses associated with a specific medical disorder; therefore, further diagnoses cannot be added.
- c. They ensure the fulfillment of minimal nursing care requirements.
- d. They optimize the time of the professional.

**20. How is a nursing diagnosis correctly formulated according to the PES format?**

- a. LABEL expressed by RELATED FACTORS associated with DEFINING CHARACTERISTICS
- b. LABEL associated with RELATED FACTORS expressed by DEFINING CHARACTERISTICS.
- c. LABEL expressed by DEFINING CHARACTERISTICS associated with RELATED FACTORS.
- d. LABEL expressed by RISK FACTORS associated with RELATED FACTORS.

**21. The nursing process:**

- a. Consists of five inter-related stages: assessment, diagnosis, planning, implementation, and evaluation.
- b. Consists of five completely independent stages: assessment, diagnosis, planning, implementation, and evaluation.
- c. Consists of four stages related to each other: assessment, diagnosis, planning, and evaluation.
- d. Consists of five stages related to each other: assessment, data analysis, diagnosis, planning, and evaluation.

**22. Gathering, validating, classifying, and recording data are stages of:**

- a. Planning
- b. Assessment
- c. A and B are correct
- d. Identification

**23. Did the patient achieve what was planned? What stage of the nursing process does it correspond to?**

- a. Assessment
- b. Evaluation
- c. Implementation
- d. Diagnosis

**24. In nursing intervention 7310 *Patient care at admission*, the following activities were performed, among others (MARK THE INCORRECT RESPONSE):**

- a. Introducing yourself and your care function.
- b. Obtaining the orders of physicians on the care to be delivered to patients.
- c. Performing the nursing assessment.
- d. Preparing the care continuity report.

**25. Can a real nursing diagnosis become a risk diagnosis?**

- a. No, a real diagnosis can only be maintained or resolved.
- b. Yes, when it is resolved but risk factors persist.
- c. Yes, when it is resolved but defining characteristics persist.
- d. No, it can only become a health promotion diagnosis.
